# Supplementary material for: Variation in Mycorrhizal Associations with Tulasnelloid Fungi among Populations of Five Dactylorhiza Species
Source: PubMed Central journal article supplement (PMC3411701; doi:10.1371/journal.pone.0042212), 2012-08-03

**Fig. S1** Location of sample sites of mycorrhizal fungi for DNA sequencing in five *Dactylorhiza* species in Belgium.

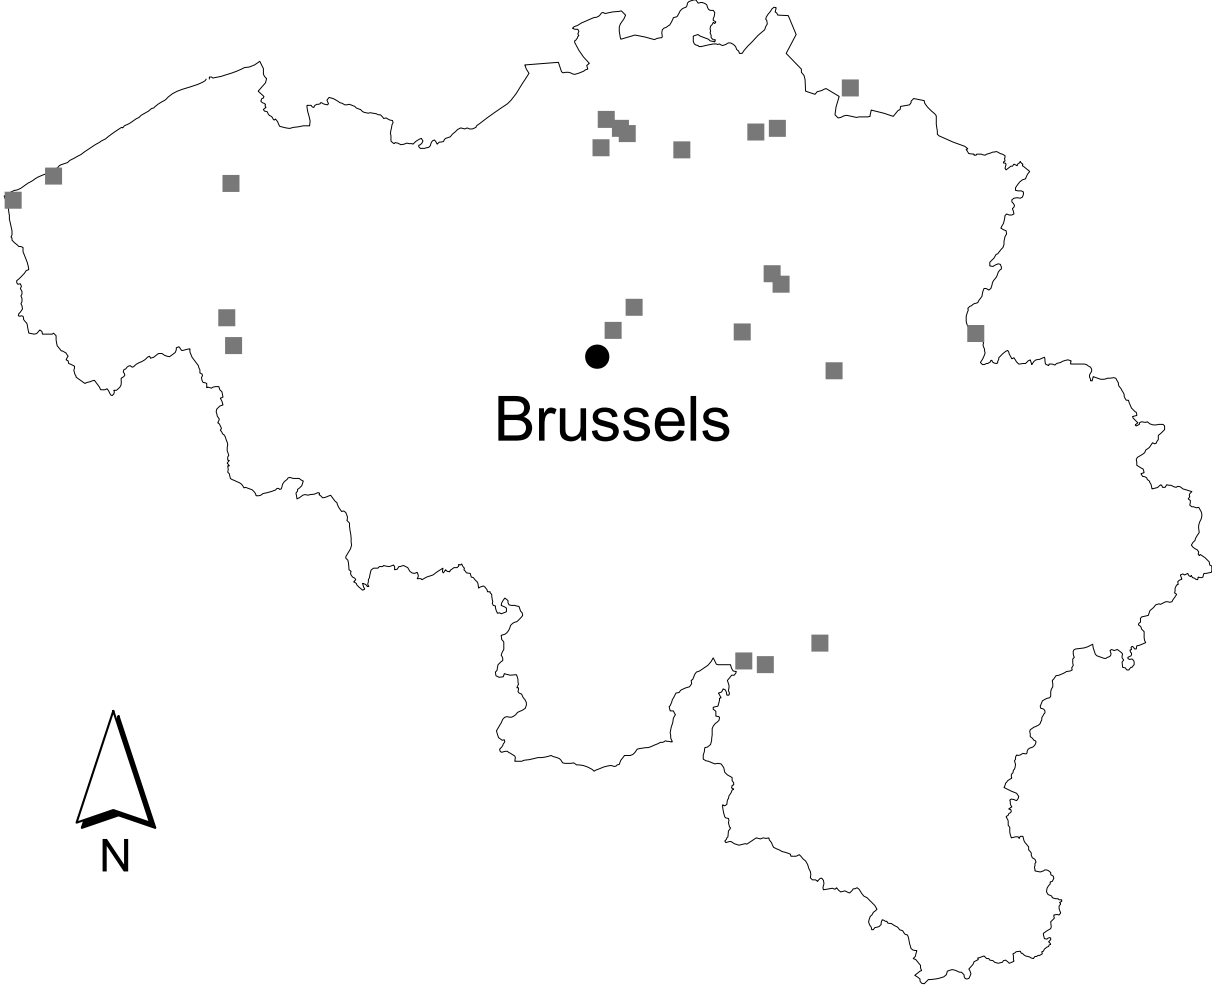

Supplement: pone.0042212.s001.pdf [file pone.0042212.s001.pdf]
