# Supplementary material for: Variation in Mycorrhizal Associations with Tulasnelloid Fungi among Populations of Five Dactylorhiza Species
Source: PubMed Central journal article supplement (PMC3411701; doi:10.1371/journal.pone.0042212), 2012-08-03

**Fig. S2** Rarefaction analysis performed on the internal transcribed spacer (ITS) sequence data obtained from the clone libraries for five *Dactylorhiza* species (1334 sequences), using a 95% sequence similarity threshold value.

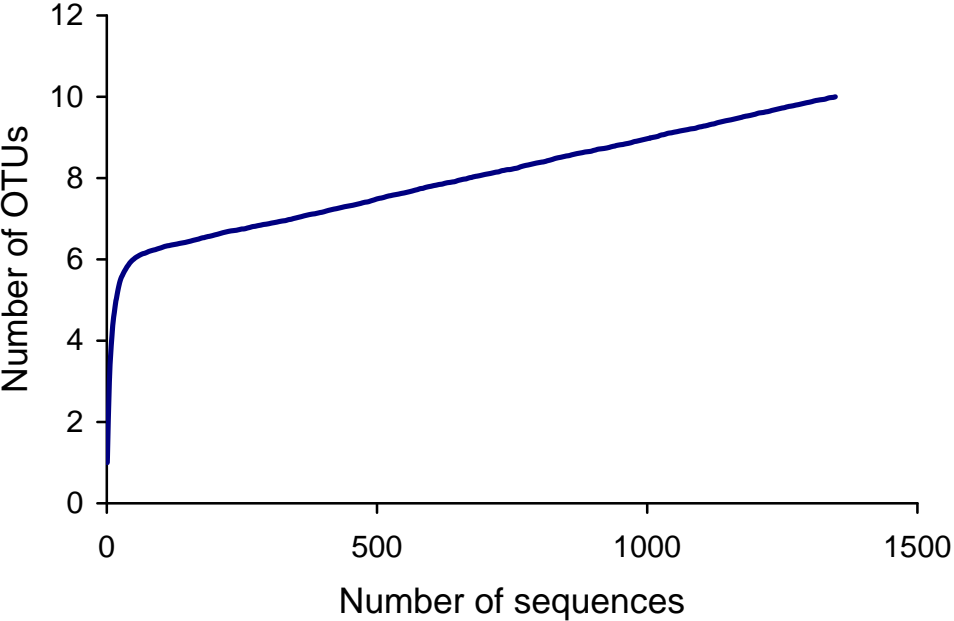

Supplement: pone.0042212.s002.pdf [file pone.0042212.s002.pdf]
